# Supplementary material for: Test-Size Evolution of the planktonic Foraminifera Globorotaliamenardii in the Eastern Tropical Atlantic since the Late Miocene
Source: Copernicus journal article supplement (doi:10.5194/bg-2021-67), 2021-03-15
Supplement: Supplementary file [file bg-2021-67-AC3-supplement.pdf]

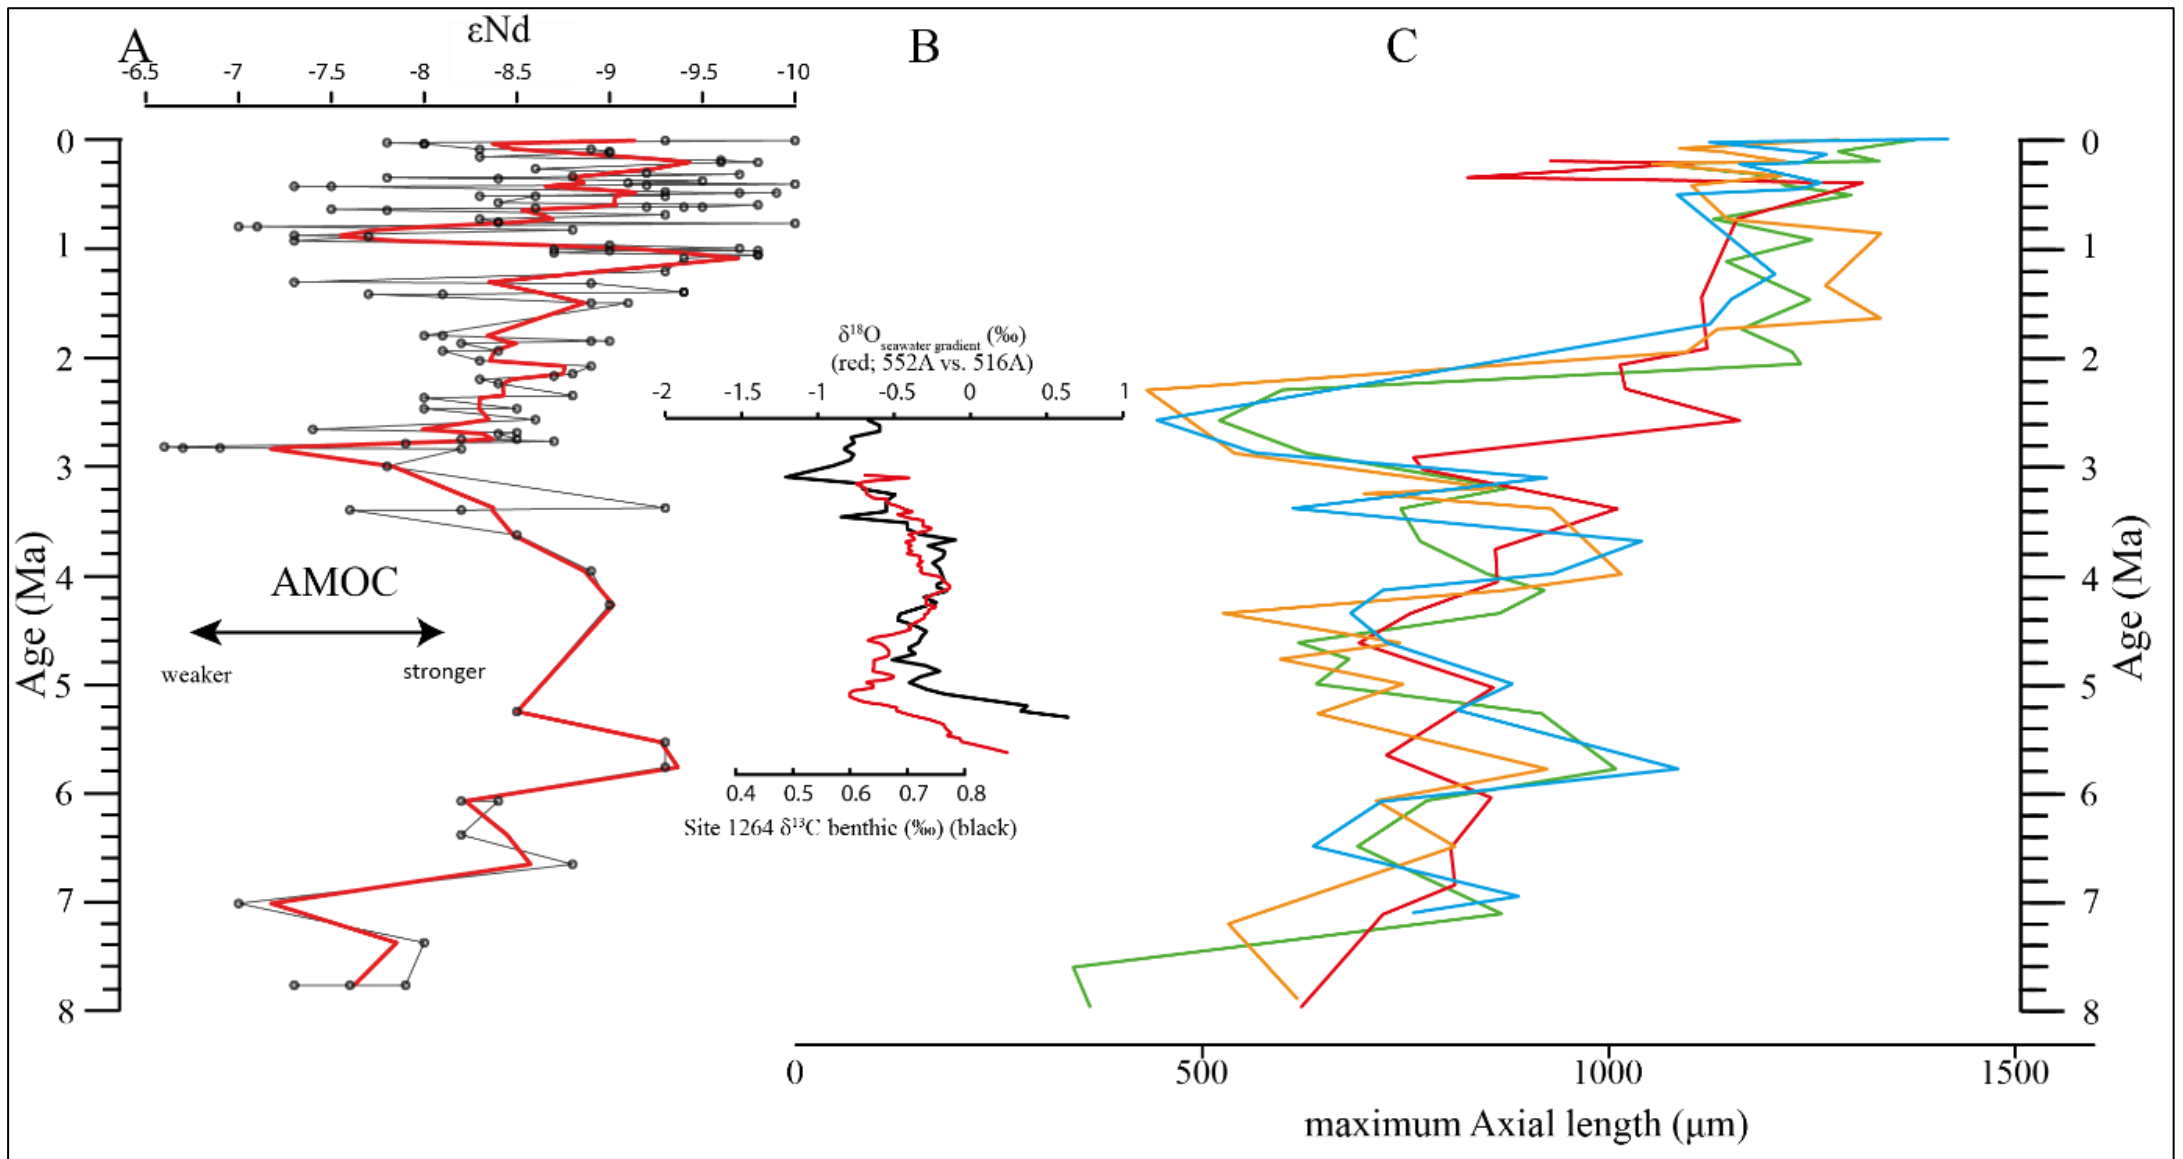

Figure 1: Comparison of seawater Neodymium isotope evolution ( $\epsilon\text{Nd}$ ), a proxy for the strength of the AMOC, and the maximum axial length of *Globorotalia menardii*. (A) Dausmann et al. (2017):  $\epsilon\text{Nd}$  at Site 1088 in the southern Atlantic Ocean. The thin black line shows the original data, the red line a smoothed version, produced with the RStudio's command 'smooth.spline' at the value of 0.35. (B) Karas et al. (2017): the red line represents the  $\delta^{18}\text{O}$  seawater gradient of the Sites 552A and 516A, while the black one is the benthic  $\delta^{13}\text{C}$  curve from Site 1264. (C) maximum axial length ( $\delta Y$ ) versus age (Ma). The green line represents the size evolution of Hole 667A (eastern tropical Atlantic; this study), orange of Hole 925B (western tropical Atlantic; Knappertsbusch, 2016), blue of Site 502 (Caribbean Sea) and red from Site 503 (eastern tropical Pacific) (Knappertsbusch, 2007).
